## SHORT COMMUNICATION

# No water, no problem: stage-specific metabolic responses to dehydration stress in annual killifish embryos

Daniel E. Zajic<sup>1,2,\*</sup>, Jonathon P. Nicholson<sup>1</sup> and Jason E. Podrabsky<sup>1</sup>

## ABSTRACT

Annual killifish survive in temporary ponds by producing drought-tolerant embryos that can enter metabolic dormancy (diapause). Survival of dehydration stress is achieved through severe reduction of evaporative water loss. We assessed dehydration stress tolerance in diapausing and developing *Austrofundulus limnaeus* embryos. We measured oxygen consumption rates under aquatic and aerial conditions to test the hypothesis that there is a trade-off between water retention and oxygen permeability. Diapausing embryos survive dehydrating conditions for over 1.5 years, and post-diapause stages can survive for over 100 days. Diapausing embryos respond to dehydration stress by increasing oxygen consumption rates while post-diapause embryos exhibit the same or reduced rates compared with aquatic embryos. Thus, water retention does not always limit oxygen diffusion. Aerial incubation coupled with hypoxia causes some embryos to arrest development. The observed stage-specific responses are consistent with an intrinsic bet-hedging strategy in embryos that would increase developmental variation in a potentially adaptive manner.

**KEY WORDS:** Metabolism, *Austrofundulus limnaeus*, Dehydration, Development, Diapause, Oxygen consumption

## INTRODUCTION

Water is essential for life and the threat of dehydration due to evaporative water loss is ever present in terrestrial organisms and especially in aquatic organisms that sometimes exploit terrestrial environments (Martin and Cooper, 1972; Martin and Carter, 2013; Martin et al., 2004; Martin, 1999; Moravek and Martin, 2011). Few aquatic organisms can exploit terrestrial habitats for prolonged periods of time, and many fish embryos that experience aerial conditions are found in moist environments for relatively short durations (days to weeks), therefore evading severe loss of water (Martin, 1999; Martin et al., 2011; McDowall and Charteris, 2006; Podrabsky et al., 2010b; Taylor, 1999; Thompson et al., 2017; Tingaud-Sequeira et al., 2009; Wells et al., 2015). Annual killifish embryos are an exception and can survive for months to years in dry mud (Polačik and Podrabsky, 2015). Survival of prolonged dehydration stress is invested solely in drought-tolerant embryos. Despite the clear importance of dehydration tolerance to the survival of annual killifishes, it remains unclear how these embryos can survive prolonged dehydration stress.

Survival through the dry season in annual killifishes is attributed to the ability of embryos to enter a state of metabolic dormancy

(diapause) as a part of their normal development (Podrabsky and Hand, 1999, 2000) and to resist evaporative water loss (Podrabsky et al., 2001). Embryos can enter diapause at three distinct stages termed diapause I, II and III (Podrabsky et al., 2017; Wourms, 1972a,b). Diapause II is the most stress-tolerant stage and is likely responsible for long-term survival of dehydrating conditions (Podrabsky et al., 2016, 2001; Dominguez-Castanedo et al., 2017). When exposed to aerial conditions, embryos initially lose about 50% of their extra-embryonic water in the first few days, but then water loss approaches zero and the embryo remains fully hydrated (Podrabsky et al., 2001). Dramatically reduced permeability to water vapor suggests highly limited gas exchange in general (Danks, 2000), and thus we predict that this mechanism for survival of dehydration stress may result in lower respiratory gas exchange and produce a self-imposed hypoxia or anoxia. Lack of oxygen (anoxia) is known to induce quiescence (halting development) in developing embryos of the annual killifish *Austrofundulus limnaeus* (Podrabsky et al., 2007), and thus we also investigated whether dehydration stress may directly or indirectly induce developmental arrest.

*Austrofundulus limnaeus* is an emerging model for developmental physiology and ecology because of their tolerance of environmental stress, their annotated genome and the ability to manipulate developmental trajectories in the lab (Podrabsky et al., 2017, 2010a; Romney et al., 2018; Wagner et al., 2018). Here, we report on the survival and metabolic responses of diapausing and developing post-diapause II embryos under aerial conditions to evaluate their survival of dehydration stress. We discuss these data in relation to the embryo ecology of annual killifishes and suggest that long-term survival in the soil may be supported by entrance into diapause II, while intrinsic variation in responses to dehydration and oxygen stress may lead to a variety of developmental outcomes.

## MATERIALS AND METHODS

### Animal husbandry and embryo collection

Adult annual killifish *Austrofundulus limnaeus* L. P. Schultz 1949 were housed and embryos collected as previously described (Podrabsky, 1999). This work was performed under established protocols which were approved and reviewed by the Portland State University Institutional Animal Care and Use Committee (PSU IACUC protocols #33 and 64). Briefly, adult annual killifish were kept in male–female pairs and spawned semi-weekly. Embryos were collected and stored at 25°C with no light in 15×100 mm plastic Petri dishes in media resembling the environmental conditions from which adults were collected in 1995 (10 mmol l<sup>-1</sup> NaCl, 2.15 mmol l<sup>-1</sup> MgCl<sub>2</sub>, 0.8 mmol l<sup>-1</sup> CaCl<sub>2</sub>, 0.14 mmol l<sup>-1</sup> KCl, 1.3 mmol l<sup>-1</sup> MgSO<sub>4</sub>) (Podrabsky, 1999; Podrabsky et al., 1998). During the first 4 days post-fertilization (dpf), embryo medium contained Methylene Blue (0.0001%) to prevent fungal infection. Embryos were then treated with two 5 min washes of a solution of 0.01% sodium hypochlorite (separated by a 5 min rest in embryo medium) to prevent

<sup>1</sup>Department of Biology, Portland State University, PO Box 751, Portland, OR 97207, USA. <sup>2</sup>Health, Human Performance, and Athletics Department, Linfield University, 900 SE Baker, McMinnville, OR 97128, USA.

\*Author for correspondence (dzajic@linfield.edu)

 D.E.Z., 0000-0002-3299-4113; J.E.P., 0000-0003-1411-8547

bacterial and fungal growth, as previously described (Podrabsky, 1999). Following sodium hypochlorite treatment, embryos were transferred to embryo medium containing  $10 \text{ mg l}^{-1}$  gentamicin sulfate and allowed to develop to diapause II (32–46 days). To break diapause II, embryos were subjected to a temperature of  $30^\circ\text{C}$  and full-spectrum light for 48 h (Meller et al., 2012). Following this treatment, embryos were sorted into synchronized cohorts by developmental stage (Podrabsky et al., 2017).

### Embryonic stages investigated

Experiments were performed on four developmental stages of embryos (Podrabsky et al., 2017; Wourms, 1972a,b) to capture a gradient of stress tolerance levels and physiology: Wourms' stage (WS) 32/33 or diapause II (DII), WS 36 (4 days post-diapause II, dpd), WS 40 (12 dpd) and WS 42 (20 dpd). DII embryos are metabolically dormant and have halted development, whereas the other stages are metabolically active and developing. In all cases, embryos were taken from a common pool of embryos produced by 42 spawning pairs of fish.

### Tolerance of aerial exposure

Embryos (DII, WS 36, WS 40, WS 42) were exposed to 85% relative humidity (RH) air at  $25^\circ\text{C}$  with no light in a sealed plastic desiccator (Nalgene, 250 mm diameter). RH was controlled by using a saturated solution of potassium chloride (750 ml) placed below the shelf and continually mixed with a stir bar to ensure uniform RH within the aerial portion of the chamber (Podrabsky et al., 2001; Winston and Bates, 1960). Prior to dehydration exposure, embryos were treated with sodium hypochlorite (see above) and were allowed to recover for 2 h at  $25^\circ\text{C}$  without light. Groups of 20 embryos ( $N=3$ ) per stage were removed from their aquatic medium and placed in Petri dishes (50 mm, PDF2047S0, Fisher Scientific, Hampton, NH, USA) containing a sterilized filter pad saturated with 2.5 ml of embryo medium containing  $10 \text{ mg l}^{-1}$  gentamicin sulfate (Podrabsky et al., 2001). Embryos were monitored until 100% mortality was reached. Embryos were determined to be dead when they lost their shape and shine. Survival between stages was compared by calculating lethal time to 50% mortality ( $LT_{50}$ ) in response to aerial exposure.

### Metabolic rate (respirometry)

#### Aerial incubation

##### DII

Embryos were treated with sodium hypochlorite (see above) and incubated in embryo medium containing  $10 \text{ mg l}^{-1}$  gentamicin sulfate and  $2.5 \mu\text{g l}^{-1}$  amphotericin B (10128-872, VWR, Radnor, PA, USA) for 24 h prior to aerial exposure. For aerial incubation, DII embryos were placed on filter pads containing 2.5 ml embryo medium containing gentamicin and amphotericin B using sterile technique within a biosafety cabinet. Care was taken to make certain that single embryos were isolated and were not touching other embryos. DII embryos were then exposed to 85% RH at  $25^\circ\text{C}$  without light for 11 days to allow equilibration of the filter pad with the aerial environment.  $N=4$  biological replicates composed of five embryos each were placed in standard opening 2 ml borosilicate glass crimp-top vials (03-391-2, 12 mm o.d.  $\times$  32 mm long, Fisher Scientific) containing a 4 mm RedEye oxygen sensor patch for non-invasive oxygen monitoring (Ocean Insight, Largo, FL, USA). Embryos were lifted off the filter pad using ring forceps and gently transferred into a vial that was pre-equilibrated with 85% RH air. No filter pad material was transferred with the embryos. Transfer of embryos was done within a biosafety cabinet using sterile technique. Vials containing embryos and sensor patches were

crimped with aluminium crimp seals and a black Viton™ elastomer septa (03-378-343, Thermo Scientific, Waltham, MA, USA). Vials and septa were equilibrated at 85% RH for 30 min prior to use. To ensure sterilization of vials and sensor patches, vials containing patches were prepared in a biosafety cabinet and UV-sterilized for several hours prior to addition of embryos.

##### WS 36 embryos

Diapause II embryos were treated with sodium hypochlorite and incubated in embryo medium containing  $10 \text{ mg l}^{-1}$  gentamicin sulfate and  $2.5 \mu\text{g l}^{-1}$  amphotericin B for 24 h. Embryos were placed on filter pads containing 2.5 ml embryo medium with gentamicin and amphotericin B using sterile technique and placed into a desiccator at 85% RH (see details above). Diapause II was broken under aerial incubation by placing the desiccator under full-spectrum light in an incubator at  $30^\circ\text{C}$ . After 72 h, the temperature was reduced to  $25^\circ\text{C}$  and the light was turned off. Following 24 h at  $25^\circ\text{C}$  without light, embryos were removed and staged. Filter pads were then weighed to ensure equilibration with chamber RH and showed no difference with the filter pads used for DII treatments. For WS 36 embryos,  $N=7$  biological replicates composed of five embryos each were used. Embryos were added to 2 ml vials containing sensor patches and crimp sealed under sterile conditions as described above.

### Aquatic incubation

DII and WS 36 embryos were sorted and treated with sodium hypochlorite, as described above. Following treatment, embryos were allowed to recover for 2 h prior to the start of the respirometry experiment. Embryo medium containing  $10 \text{ mg l}^{-1}$  gentamicin sulfate was aerated by gentle bubbling with atmospheric air at  $25^\circ\text{C}$  for 1 h to ensure dissolved oxygen (DO) saturation. To prevent supersaturation, medium was allowed to equilibrate for 5 min without aeration prior to use. Embryo medium was then added to vials containing five embryos each (DII,  $N=4$ ; WS 36,  $N=5$ ) and a sensor patch. Vials were immediately crimp sealed with Viton™ caps, making sure to leave no air bubbles trapped within the vials.

### Oxygen measurement and embryo observation

Measurements of sensor patch fluorescence were made through the vial wall using a fiber optic probe in conjunction with a NeoFox Oxygen Sensing System (Ocean Insight). For aquatic conditions, the system was calibrated to 100% DO saturation using vials containing embryo medium aerated with atmospheric air at  $25^\circ\text{C}$  and 0% DO saturation using embryo medium bubbled with  $\text{N}_2$  for 30 min and equilibrated overnight in a Bactron III anaerobic chamber (Sheldon Manufacturing, Cornelius, OR, USA), containing 5%  $\text{CO}_2$ , 5%  $\text{H}_2$  and 90%  $\text{N}_2$ . For aerial conditions, the system was calibrated to 100% saturation using vials containing atmospheric air at  $25^\circ\text{C}$  and 0% saturation using 5%  $\text{CO}_2$ , 5%  $\text{H}_2$  and 90%  $\text{N}_2$  from the anaerobic chamber. Previous observations illustrated no effects of the anaerobic gas mixture on fluorescence measurements (data not shown). Vials sealed at 0% and 100% saturation (both aerial and aquatic) were regularly measured alongside samples. These control vials remained consistent across the entire duration of the experiments, and were used as blank vials to control for the possibility of contamination and to ensure stable calibration of the NeoFox Oxygen Sensing System. Oxygen concentration was monitored regularly and oxygen consumption rate was used as a proxy for metabolic rate. All measurements were taken at  $25^\circ\text{C}$  with minimal light. Following measurement of oxygen concentration, embryos were observed under a dissection microscope (Leica, S8 APO, Wetzlar, Germany) to record health and developmental stage. Rate of oxygen consumption

was calculated using the slope of decrease in oxygen content inside each vial over time divided by the number of embryos in the vial. Oxygen consumption is presented as  $\text{nmol O}_2 \text{ h}^{-1} \text{ embryo}^{-1}$ .

### Statistical analysis

Graphical and statistical analyses were performed using Prism 8.0 software (GraphPad, La Jolla, CA, USA) and SPSS software (IBM, v.26.0, Armonk, NY, USA).  $\text{LT}_{50}$  of embryos exposed to dehydration was calculated for each developmental stage by probit regression analysis (Chapman et al., 1995) using SPSS software. Where appropriate, analysis of variance (ANOVA), unpaired  $t$ -test or linear regression analysis was used. Tukey's honestly significant difference (HSD) test was used for *post hoc* comparisons, where applicable. Statistical significance was set to  $P < 0.05$  for all comparisons.

## RESULTS AND DISCUSSION

Despite knowledge of the unprecedented ability of annual killifish embryos to survive long periods of aerial exposure, this is the first report of  $\text{LT}_{50}$  values measured under controlled conditions. Tolerance of aerial conditions was greatest in DII embryos, with 10% surviving

for over 500 days and a single embryo living for 587 days (Fig. 1A), and decreased during post-diapause II development. Remarkably, all post-diapause II stages had embryos that survived for longer than 100 days, although the  $\text{LT}_{50}$  values were around a month of exposure for late-stage embryos. The ability of these embryos to survive in 85% RH for hundreds of days is impressive for an aquatic embryo, especially considering that 85% RH is equivalent to being bathed in a solution of around  $8000 \text{ mosmol kg}^{-1}$  salt (around  $8 \times$  seawater). This ability is almost unparalleled in any other aquatic species and certainly suggests unique adaptations for preventing evaporative water loss to levels that rival those of terrestrial eggs.

The long-term survival of DII embryos during aerial incubation may require physiological responses to both prevent and respond to evaporative water loss. The egg envelope, perivitelline space and enveloping cell layer of embryos likely work in concert to resist water loss and support survival (Podrabsky et al., 2001), and molecular changes to these structures are of interest in explaining the extreme resistance to water loss. Over time, the embryonic compartment eventually loses enough water that the embryos die (Podrabsky et al., 2001), and thus, as observed in other species, mechanisms may be induced to help stabilize cellular components and preserve macromolecules as water content slowly declines (Bayley and Holmstrup, 1999; Bayley et al., 2001; Lopez-Martinez et al., 2009). It is worth noting that the accumulation of hygroscopic compounds is a very unlikely mechanism for survival of *A. limnaeus* embryos, as this response is only effective at very high RH ( $>98\%$ ) and previous reports of exposure to aerial dehydration stress indicate bulk water in the embryonic compartment and not structured water, as would be expected if high amounts of osmolytes were accumulating (Podrabsky et al., 2001).

It is likely that *A. limnaeus* populations survive the dry seasons through entrance into diapause II (Podrabsky et al., 2016, 2001). A field survey of African annual killifish embryos (genus *Nothobranchius*) revealed an egg bank primarily of diapause II embryos during the peak dry season (M. Polačik, M. Vrtilek, M. Reichard, R. Blazek and J.E.P, unpublished results). This is consistent with the remarkable tolerance of diapause II embryos to aerial conditions. However, even the lower tolerance of WS 36 embryos is impressive and suggests induction of mechanisms that could support survival through a typical dry season if soil conditions remain at 85% RH or greater.

DII embryos consumed the available oxygen in aquatic vials faster, but at a slower rate than in aerial vials (Fig. 2A,C,E; 33 times lower available oxygen in water compared with air). Aerial DII embryos had an oxygen consumption rate that was over 4 times higher than that of aquatic embryos despite remaining in diapause for the duration of the experiment (Fig. 3A). These results are even more surprising given that under aerobic aquatic conditions, DII embryos support a large portion of their metabolism via anaerobic pathways (Podrabsky and Hand, 1999; Podrabsky et al., 2012). These data suggest either an energetic cost of survival of aerial conditions or a diffusion-limited metabolism under aquatic conditions. Like all fish embryos prior to hatching, *A. limnaeus* embryos are limited to diffusive gas exchange with their environment. Under conditions of stagnant water flow, this can lead to large boundary layers (up to 5 mm) that may limit diffusion rates (DiMichele and Powers, 1984). Further, the thick egg envelope of annual killifishes (Schoots et al., 1982) may also contribute to limited rates of diffusion. When exposed to aerial conditions, embryos of *A. limnaeus* lose most of their perivitelline water within the first week (Podrabsky et al., 2001), which effectively brings the egg envelope closer to the fully hydrated embryonic compartment and may reduce the diffusion distance for gas exchange.

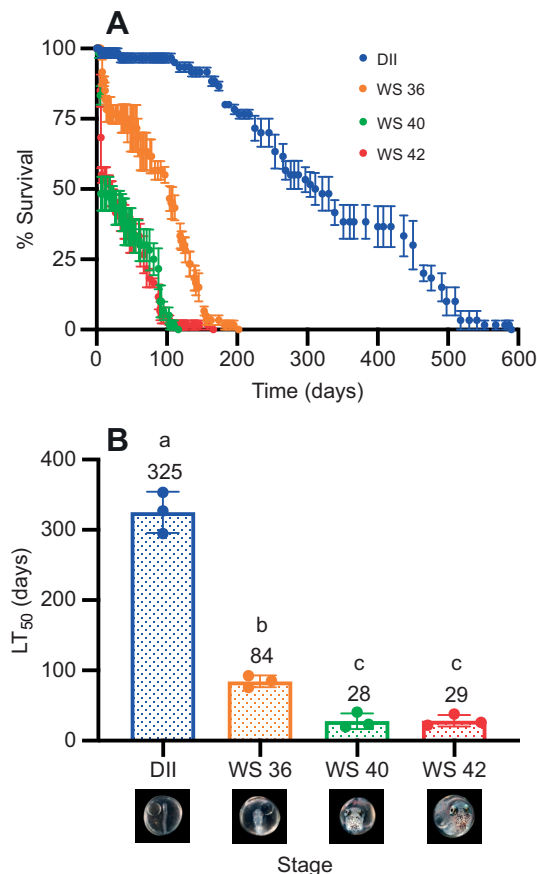

**Fig. 1. Survival of *Austrofundulus limnaeus* embryos incubated in aerial conditions.** (A) Groups of 20 embryos were exposed to 85% relative humidity (RH) at 25°C without light at the developmental stage listed. Diapause II embryos remained in diapause, whereas post-diapause II embryos continued developing. WS, Wourms' stage; DII, diapause II. Symbols are means  $\pm$  s.e.m. ( $N=3$ ). (B) Lethal time to 50% mortality ( $\text{LT}_{50}$ ) for embryos exposed to aerial conditions. Different letters indicate significant differences in  $\text{LT}_{50}$  between stages (one-way ANOVA with Tukey's HSD test,  $P < 0.05$ ). Bars are means  $\pm$  s.e.m. ( $N=3$ ) and symbols represent individual replicates. Numbers above bars are the mean  $\text{LT}_{50}$  value.

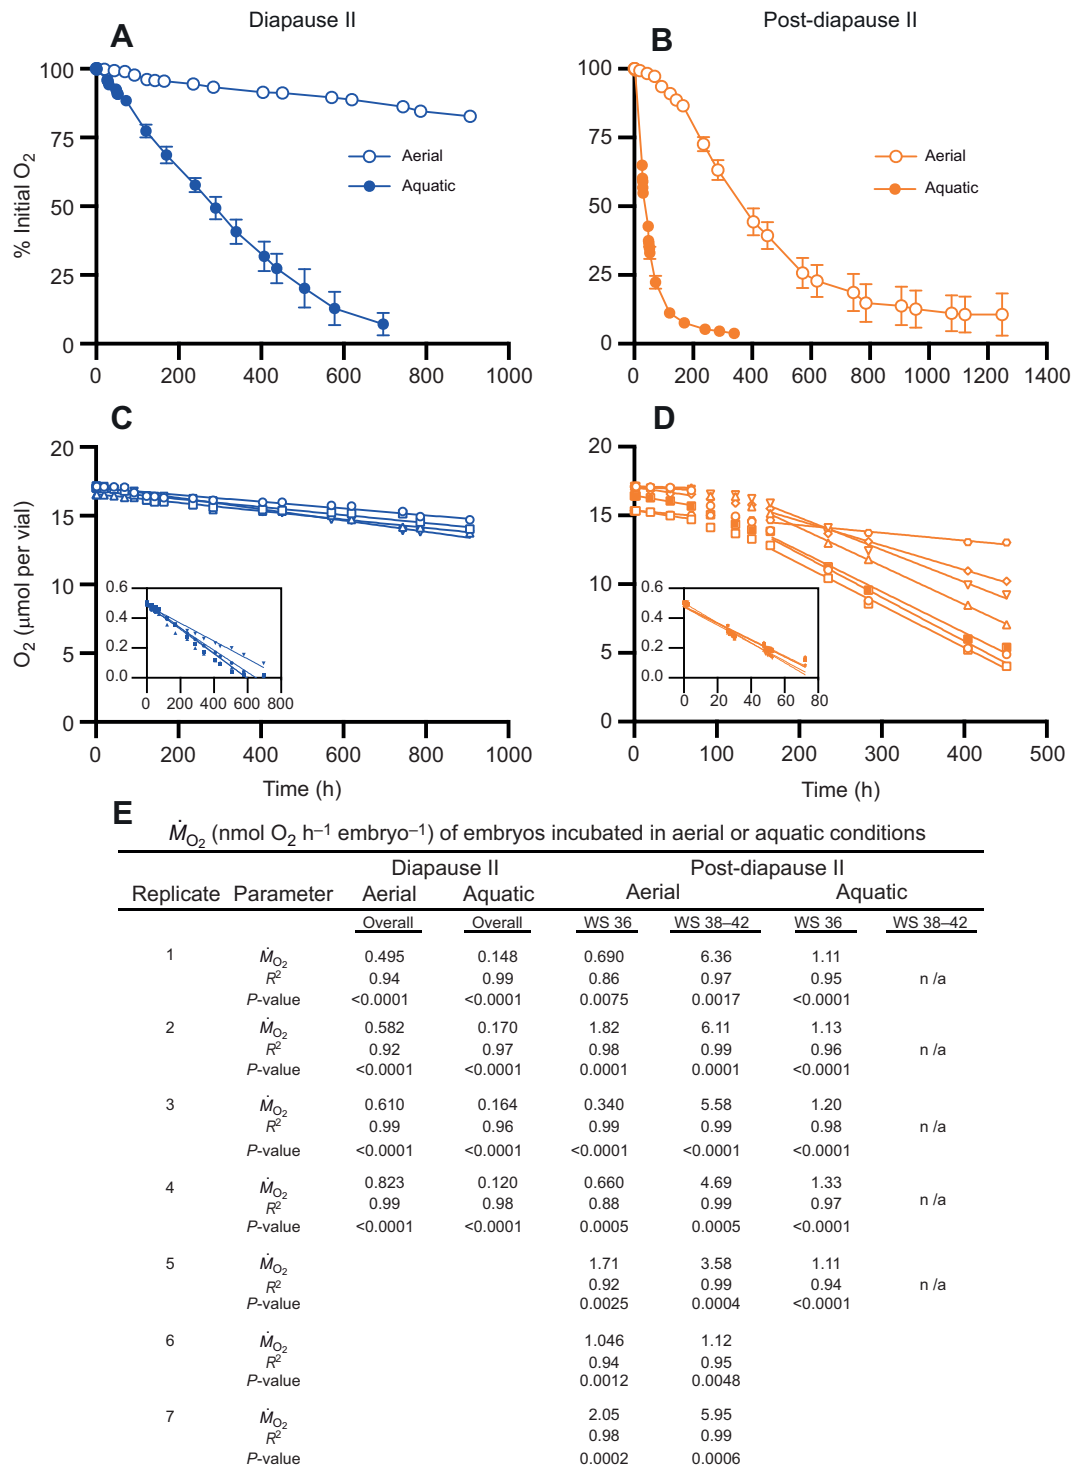

**Fig. 2. Oxygen consumption of *A. limnaeus* embryos in aerial and aquatic conditions.** (A,B) Percentage of initial oxygen in the closed system respirometry vials over time. Symbols are means±s.e.m. (N=4–7) and each replicate contained 5 embryos per vial. (C,D) The amount of oxygen in each aerial exposure vial over time. Inset graphs are for aquatic conditions. Oxygen consumption rates were based on the slope of oxygen consumed over time. For DII embryos, a single slope was used for the entire time course for both conditions. For post-diapause II embryos, an initial WS 36 (aerial, 0–69 h; aquatic, 0–72 h) and late-stage slope (aerial, 165–452 h) were calculated. For aerial embryos, time points were omitted from regression analyses because of oxygen content not changing linearly (69–165 h) or because oxygen content was below the measured critical oxygen level ( $P_{crit}$ ) of *A. limnaeus* embryos (after 452 h) (Podrabsky and Wilson, 2016). (E) Results from the regression analyses for each biological replicate used to calculate oxygen consumption rate ( $\dot{M}_{O_2}$ ).

The diffusion coefficients through the egg envelope under hydrated and aerial conditions are unknown and would need to be determined to evaluate whether diffusion may be limiting gas exchange. However, this explanation is unlikely given the low metabolic

demand for oxygen in DII embryos. Further, developing embryos of *Fundulus heteroclitus* (DiMichele and Powers, 1984) do not exhibit diffusion-limited metabolic rate in aquatic conditions until extremely late in development and do not experience an increase in oxygen

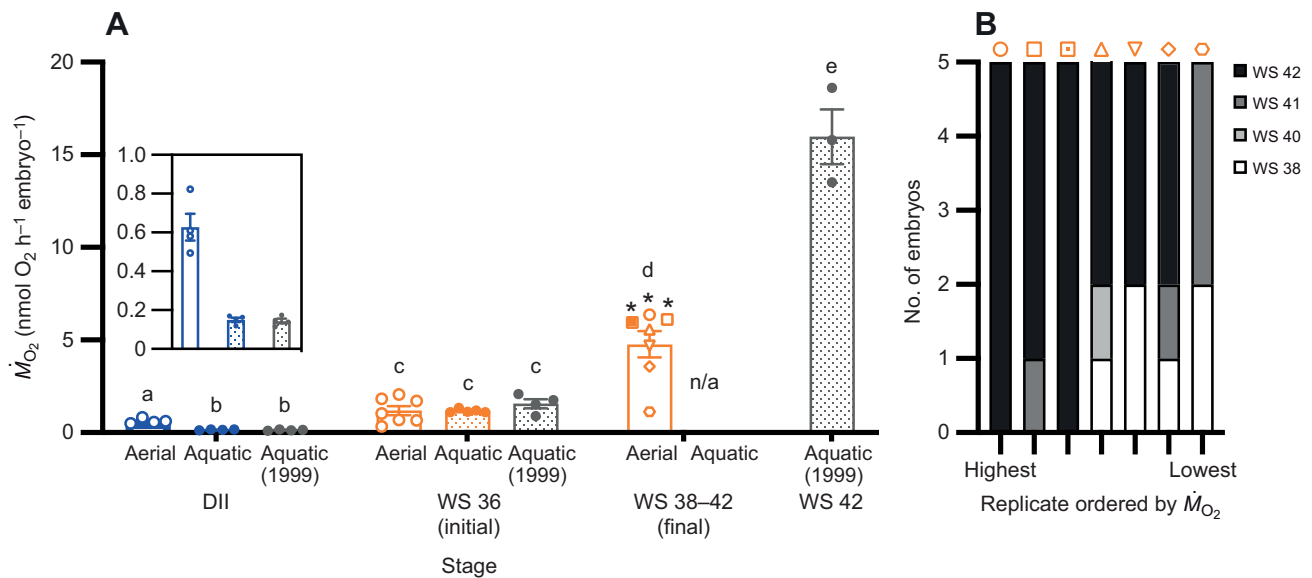

**Fig. 3. Rate of oxygen consumption in *A. limnaeus* embryos exposed to aquatic and aerial conditions.** (A) DII embryos exposed to aerial conditions had a significantly higher oxygen consumption rate than those exposed to aquatic conditions (one-way ANOVA with Tukey's HSD,  $P < 0.0001$ ). Inset graph shows DII rates on an expanded scale. Wourms' stage 36 embryos (initial rate) exposed to aerial conditions had a mean oxygen consumption rate similar to that of embryos incubated in aquatic conditions (one-way ANOVA with Tukey's HSD,  $P > 0.05$ ). Oxygen consumption rates in late-stage embryos under aerial conditions varied considerably by replicate as a result of differences in developmental rates in embryos within each replicate, as indicated by the developmental stage of embryos in each vial at the end of the experiment (B). Replicates that developed synchronously to WS 42 in aerial conditions (replicates with asterisks in A) had significantly lower oxygen consumption rates than those of WS 42 embryos developing in aquatic conditions reported in Podrabsky and Hand (1999) (unpaired  $t$ -test,  $P = 0.003$ ). Different letters indicate significant differences in rates of oxygen consumption (one-way ANOVA with Tukey's HSD test,  $P < 0.01$ ). For late-stage embryo measurements, symbols in A and B correspond to those used in Fig. 2D for post-diapause II embryos. Bars in A are means  $\pm$  s.e.m. ( $N = 4$ ) and symbols represent individual replicates. Oxygen consumption rates for aquatic embryos from Podrabsky and Hand (1999) are included to demonstrate similar values despite use of different respirometry techniques.

consumption under aerial conditions. Thus, it is much more likely that the increased oxygen consumption rate in DII embryos represents the cost of a physiological response that requires reactivation of suppressed metabolic pathways needed for survival of dehydration stress.

All post-diapause II embryos began respirometry experiments at WS 36; however, the duration of aquatic exposures was short as a consequence of exhaustion of oxygen in the vials (Fig. 2B). Initially, post-diapause II embryos (WS 36) of *A. limnaeus* maintained a similar oxygen consumption rate in aerial and aquatic conditions (Fig. 3A). This result is consistent with previous reports for *F. heteroclitus* (DiMichele and Powers, 1984; Tingaud-Sequeira et al., 2009). Initially, post-diapause II embryos developed synchronously, but then developed at different rates after 7 days of aerial exposure (Fig. 3B), leading to a divergence in oxygen consumption rates between replicates over time (Figs 2D,E and 3A). Late-stage aerial incubated embryos had a significantly higher oxygen consumption rate than initial rates observed in aerial and aquatic treatments, as would be expected for continually developing embryos (Fig. 3A). However, mean oxygen consumption rate in aerial WS 42 embryos that developed synchronously and continuously was significantly lower (60% lower) compared with that reported for aquatic conditions in previous studies (Fig. 3A). This result for late stage embryos is consistent with observations in *Kryptolebias marmoratus*, which experience a 44% reduction in oxygen consumption rate in response to aerial exposure (Wells et al., 2015). It is important to note that oxygen consumption rates in *A. limnaeus* begin to diverge (Fig. 2D) at  $P_{O_2}$  values well above the measured critical oxygen level ( $P_{crit}$ ) of *A. limnaeus* embryos under aquatic conditions (Podrabsky and Wilson, 2016). Thus, lower rates of oxygen consumption are not likely to be due to an acute response to hypoxia, but more likely

represent a physiological response (metabolic depression) to a mixture of dehydration stress and hypoxia.

While the majority of the aerial embryos continued developing similarly to their aquatic counterparts, a subset (6/35, 17%) of the embryos in four of the experimental vials remained at WS 38 from day 7 until the completion of the experiment at day 19. Embryos of *A. limnaeus* enter quiescence in response to anoxia (Podrabsky et al., 2007), but this is the first report of quiescence-like behavior in response to aerial conditions. It is likely that this stalling of development is due to a combination of mild hypoxia and aerial exposure, because embryos exposed to 85% RH in large containers where oxygen is not limited, tend to develop synchronously (D.E.Z., personal observation). Of great interest is the apparent intrinsic variation observed in response to the aerial incubation conditions, which leads to developmental arrest in only a proportion of embryos. Asynchronous development could have profound influences on the developmental ecology of this species. A pool of embryos in the soil at different developmental stages could be advantageous for species persistence by reducing the probability of total recruitment failure driven by false environmental cues of an imminent rainy season (Domínguez-Castanedo et al., 2017). Thus, this could represent a form of intrinsic bet hedging and a source of added variation in the egg bank that increases the probability of population survival in a given location (Furness et al., 2015). As stress tolerance decreases during post-diapause II development (Machado and Podrabsky, 2007; Podrabsky et al., 2007; Riggs and Podrabsky, 2017; Wagner et al., 2019), slowing developmental rate during aerial exposure may prolong the period of stress tolerance and increase survival.

In summary, we show for the first time that embryos of *A. limnaeus* can survive aerial incubation for well over a year. If evaporative water

loss is achieved through a general decrease in membrane permeability, aerial incubation should limit respiratory gas exchange and lead to self-imposed hypoxia or anoxia. While the results for late-stage embryos are consistent with this hypothesis, DII embryos respond in an opposite manner. This leads to an especially interesting question of how these embryos increase their oxygen consumption rate while simultaneously reducing evaporative water loss to near zero for over a year in extremely dehydrating conditions. These unique responses to dehydration in dormant versus developing embryos may have important implications for the ecology of embryos in the wild.

#### Acknowledgements

The authors would like to thank Dr Jeffrey M. Duerr for allowing us to use his respirometry equipment. In addition, we would like to thank all of the undergraduate student workers who help with animal husbandry and maintenance.

#### Competing interests

The authors declare no competing or financial interests.

#### Author contributions

Conceptualization: D.E.Z., J.P.N., J.E.P.; Methodology: D.E.Z., J.P.N., J.E.P.; Formal analysis: D.E.Z., J.E.P.; Investigation: D.E.Z., J.P.N., J.E.P.; Data curation: D.E.Z., J.E.P.; Writing - original draft: D.E.Z.; Writing - review & editing: D.E.Z., J.P.N., J.E.P.; Visualization: D.E.Z., J.E.P.; Supervision: J.E.P.; Funding acquisition: J.E.P.

#### Funding

The work was supported by National Science Foundation grant IOS-1354549 to J.E.P.

#### References

- Bayley, M. and Holmstrup, M. (1999). Water vapor absorption in arthropods by accumulation of myoinositol and glucose. *Science* **285**, 1909-1911. doi:10.1126/science.285.5435.1909
- Bayley, M., Petersen, S. O., Knigge, T., Köhler, H.-R. and Holmstrup, M. (2001). Drought acclimation confers cold tolerance in the soil collembolan *Folsomia candida*. *J. Insect Physiol.* **47**, 1197-1204. doi:10.1016/S0022-1910(01)00104-4
- Chapman, G. A., Denton, D. L. and Lazorchak, J. M. (1995). *Short-Term Methods for Estimating the Chronic Toxicity of Effluents and Receiving Waters to West Coast Marine and Estuarine Organisms*, Vol. 1, pp. 1-673. Cincinnati, OH: National Service Center for Environmental Publications.
- Danks, H. V. (2000). Dehydration in dormant insects. *J. Insect Physiol.* **46**, 837-852. doi:10.1016/S0022-1910(99)00204-8
- DiMichele, L. and Powers, D. A. (1984). The relationship between oxygen consumption rate and hatching in *Fundulus heteroclitus*. *Physiol. Zool.* **57**, 46-51. doi:10.1086/physzool.57.1.30155966
- Domínguez-Castanedo, O., Valdesalici, S. and Rosales-Torres, A. M. (2017). Developmental ecology of annual killifish *Millerichthys robustus* (Cyprinodontiformes: Cynolebiidae). *Dev. Dyn.* **246**, 802-806. doi:10.1002/dvdy.24519
- Furness, A. I., Lee, K. and Reznick, D. N. (2015). Adaptation in a variable environment: Phenotypic plasticity and bet-hedging during egg diapause and hatching in an annual killifish. *Evolution* **69**, 1461-1475. doi:10.1111/evo.12669
- Lopez-Martinez, G., Benoit, J. B., Rinehart, J. P., Elnitsky, M. A., Lee, R. E. and Denlinger, D. L. (2009). Dehydration, rehydration, and overhydration alter patterns of gene expression in the Antarctic midge, *Belgica antarctica*. *J. Comp. Physiol. B* **179**, 481-491. doi:10.1007/s00360-008-0334-0
- Machado, B. E. and Podrabsky, J. E. (2007). Salinity tolerance in diapausing embryos of the annual killifish *Austrofundulus limnaeus* is supported by exceptionally low water and ion permeability. *J. Comp. Physiol. B Biochem. Syst. Envir. Physiol.* **177**, 809-820. doi:10.1007/s00360-007-0177-0
- Martin, K. L. M. (1999). Ready and waiting: delayed hatching and extended incubation of anamniotic vertebrate terrestrial eggs. *Am. Zool.* **39**, 279-288. doi:10.1093/icb/39.2.279
- Martin, K. L. and Carter, A. L. (2013). Brave new propagules: terrestrial embryos in anamniotic eggs. *Integr. Comp. Biol.* **53**, 233-247. doi:10.1093/icb/ict018
- Martin, A. A. and Cooper, A. K. (1972). The ecology of terrestrial anuran eggs, genus *Crinia* (Leptodactylidae). *Copeia* **1972**, 163-168. doi:10.2307/1442793
- Martin, K., Van Winkle, R., Draiss, J. and Lakisic, H. (2004). Beach-spawning fishes, terrestrial eggs, and air breathing. *Physiol. Biochem. Zool.* **77**, 750-759. doi:10.1086/421755
- Martin, K. L. M., Moravek, C. L. and Walker, A. J. (2011). Waiting for a sign: extended incubation postpones larval stage in the beach spawning California grunion *Leuresthes tenuis* (Ayres). *Environ. Biol. Fishes* **91**, 63-70. doi:10.1007/s10641-010-9760-4
- McDowall, R. M. and Charteris, S. C. (2006). The possible adaptive advantages of terrestrial egg deposition in some fluvial diadromous galaxiid fishes (Teleostei: Galaxiidae). *Fish and Fisheries* **7**, 153-164. doi:10.1111/j.1467-2979.2006.00217.x
- Meller, C. L., Meller, R., Simon, R. P., Culpepper, K. M. and Podrabsky, J. E. (2012). Cell cycle arrest associated with anoxia-induced quiescence, anoxic preconditioning, and embryonic diapause in embryos of the annual killifish *Austrofundulus limnaeus*. *J. Comp. Physiol. B* **182**, 909-920. doi:10.1007/s00360-012-0672-9
- Moravek, C. L. and Martin, K. L. (2011). Life goes on: delayed hatching, extended incubation, and heterokairy in development of embryonic California Grunion, *Leuresthes tenuis*. *Copeia* **2011**, 308-314. doi:10.1643/CG-10-164
- Podrabsky, J. E. (1999). Husbandry of the annual killifish *Austrofundulus limnaeus* with special emphasis on the collection and rearing of embryos. *Environ. Biol. Fishes* **54**, 421-431. doi:10.1023/A:1007598320759
- Podrabsky, J. E. and Hand, S. C. (1999). The bioenergetics of embryonic diapause in an annual killifish, *Austrofundulus limnaeus*. *J. Exp. Biol.* **202**, 2567-2580.
- Podrabsky, J. E. and Hand, S. C. (2000). Depression of protein synthesis during diapause in embryos of the annual killifish *Austrofundulus limnaeus*. *Physiol. Biochem. Zool.* **73**, 799-808. doi:10.1086/318106
- Podrabsky, J. E. and Wilson, N. E. (2016). Hypoxia and anoxia tolerance in the annual killifish *Austrofundulus limnaeus*. *Integrative and Comparative Biology* **56**, 500-509. doi:10.1093/icb/icw092
- Podrabsky, J. E., Hrbek, T. and Hand, S. C. (1998). Physical and chemical characteristics of ephemeral pond habitats in the Maracaibo basin and Llanos region of Venezuela. *Hydrobiologia* **362**, 67-78. doi:10.1023/A:1003168704178
- Podrabsky, J. E., Carpenter, J. F. and Hand, S. C. (2001). Survival of water stress in annual fish embryos: dehydration avoidance and egg envelope amyloid fibers. *Am. J. Physiol.* **280**, R123-R131. doi:10.1152/ajpregu.2001.280.1.R123
- Podrabsky, J. E., Lopez, J. P., Fan, T. W. M., Higashi, R. and Somero, G. N. (2007). Extreme anoxia tolerance in embryos of the annual killifish *Austrofundulus limnaeus*: insights from a metabolomics analysis. *J. Exp. Biol.* **210**, 2253-2266. doi:10.1242/jeb.005116
- Podrabsky, J. E., Garrett, I. D. F. and Kohl, Z. F. (2010a). Alternative developmental pathways associated with diapause regulated by temperature and maternal influences in embryos of the annual killifish *Austrofundulus limnaeus*. *J. Exp. Biol.* **213**, 3280-3288. doi:10.1242/jeb.045906
- Podrabsky, J. E., Tingaud-Sequeira, A. and Cerdà, J. (2010b). Metabolic dormancy and responses to environmental desiccation in fish embryos. In *Dormancy and Resistance in Harsh Environments* (ed. E. Lubzens, J. Cerda and M. Clark), pp. 203-226: Springer.
- Podrabsky, J. E., Menze, M. A. and Hand, S. C. (2012). Rapid Communication: Long-term survival of anoxia despite rapid ATP decline in embryos of the annual killifish *Austrofundulus limnaeus*. *J. Exp. Zool. A Ecol. Genet. Physiol.* **317**, 524-532. doi:10.1002/jez.1744
- Podrabsky, J., Riggs, C. and Wagner, J. (2016). Tolerance of environmental stress. In *Annual Fishes. Life History Strategy, Diversity, and Evolution* (ed. N. Berois, G. García and R. De Sá), pp. 159-184. Boca Raton, FL, USA: CRC Press, Taylor & Francis.
- Podrabsky, J., Riggs, C., Romney, A., Woll, S., Wagner, J., Culpepper, K. and Cleaver, T. (2017). Embryonic development of the annual killifish *Austrofundulus limnaeus*: An emerging model for ecological and evolutionary developmental biology research and instruction. *Dev. Dyn.* **246**, 779-801. doi:10.1002/dvdy.24513
- Poláčik, M. and Podrabsky, J. E. (2015). Temporary environments. In *Extremophile Fishes: Ecology, Evolution, and Physiology of Teleosts in Extreme Environments* (ed. R. Riesch, M. Tobler and M. Plath), pp. 217-245. Cham, Switzerland: Springer.
- Riggs, C. and Podrabsky, J. (2017). Small noncoding RNA expression during extreme anoxia tolerance of annual killifish (*Austrofundulus limnaeus*) embryos. *Physiol. Genomics* **49**, 505-518. doi:10.1152/physiolgenomics.00016.2017
- Romney, A. L. T., Davis, E. M., Corona, M. M., Wagner, J. T. and Podrabsky, J. (2018). Temperature dependent vitamin D signaling regulates developmental trajectory associated with diapause in an annual killifish. *Proc. Natl. Acad. Sci. USA* **115**, 12763-12768. doi:10.1073/pnas.1804590115
- Schoots, A. F. M., Stikkelbroeck, J. J. M., Bekhuis, J. F. and Dencucé, J. M. (1982). Hatching in teleostean fishes: fine structural changes in the egg envelope during enzymatic breakdown *in vivo* and *in vitro*. *J. Ultrastruct. Res.* **80**, 185-196. doi:10.1016/S0022-5320(82)90017-X
- Taylor, M. H. (1999). A suite of adaptations for intertidal spawning. *Am. Zool.* **39**, 313-320. doi:10.1093/icb/39.2.313
- Thompson, A. W., Hayes, A., Podrabsky, J. E. and Ortí, G. (2017). Gene expression during delayed hatching in fish-out-of-water. *Ecol. Genet. Genomics* **3**, 52-59. doi:10.1016/j.egg.2017.09.002
- Tingaud-Sequeira, A., Zapater, C., Chauvigné, F., Otero, D. and Cerdà, J. (2009). Adaptive plasticity of killifish (*Fundulus heteroclitus*) embryos: dehydration-stimulated development and differential aquaporin-3 expression. *Am. J. Physiol. Regul. Integr. Comp. Physiol.* **296**, R1041-R1052. doi:10.1152/ajpregu.91002.2008

- Wagner, J. T., Singh, P. P., Romney, A. L., Riggs, C. L., Minx, P., Woll, S. C., Roush, J., Warren, W. C., Brunet, A. and Podrabsky, J. E.** (2018). The genome of *Austrofundulus limnaeus* offers insights into extreme vertebrate stress tolerance and embryonic development. *BMC Genomics* **19**, 155. doi:10.1186/s12864-018-4539-7
- Wagner, J. T., Knapp, M. J. and Podrabsky, J. E.** (2019). Antioxidant capacity and anoxia tolerance in *Austrofundulus limnaeus* embryos. *J. Exp. Biol.* **222**, jeb204347. doi:10.1242/jeb.204347
- Wells, M. W., Turko, A. J. and Wright, P. A.** (2015). Fish embryos on land: terrestrial embryo deposition lowers oxygen uptake without altering growth or survival in the amphibious fish *Kryptolebias marmoratus*. *J. Exp. Biol.* **218**, 3249-3256. doi:10.1242/jeb.127399
- Winston, P. W. and Bates, D. H.** (1960). Saturated solutions for the control of humidity in biological research. *Ecology* **41**, 232-237. doi:10.2307/1931961
- Wourms, J. P.** (1972a). The developmental biology of annual fishes I. Stages in the normal development of *Austrofundulus myersi* Dahl. *J. Exp. Zool.* **182**, 143-168. doi:10.1002/jez.1401820202
- Wourms, J. P.** (1972b). The developmental biology of annual fishes III. Pre-embryonic and embryonic diapause of variable duration in the eggs of annual fishes. *J. Exp. Zool.* **182**, 389-414. doi:10.1002/jez.1401820310
